# Supplementary material
Source: PubMed Central journal article supplement (PMC4836973)
Supplement: NIHMS755504-supplement-1.pdf [file NIHMS755504-supplement-1.pdf]

# Supplementary Information

## Parallel shRNA and CRISPR-Cas9 screens enable antiviral drug target identification

Richard M. Deans<sup>1,2</sup>, David W. Morgens<sup>2</sup>, Ayşe Ökesli<sup>1</sup>, Sirika Pillay<sup>3</sup>, Max A. Horlbeck<sup>4</sup>, Martin Kampmann<sup>4</sup>, Luke A. Gilbert<sup>4</sup>, Amy Li<sup>2</sup>, Roberto Mateo<sup>3</sup>, Mark Smith<sup>5</sup>, Jeffrey S. Glenn<sup>3,5,6</sup>, Jan E. Carette<sup>3</sup>, Chaitan Khosla<sup>1,5,7,8\*</sup>,  
and Michael C. Bassik<sup>2,5\*</sup>

### **Affiliations:**

<sup>1</sup>Department of Chemistry, Stanford University, Stanford, CA 94305, USA

<sup>2</sup>Department of Genetics, Stanford University, Stanford, CA 94305, USA

<sup>3</sup>Department of Microbiology and Immunology, Stanford University, Stanford, CA 94305, USA

<sup>4</sup>Department of Cellular and Molecular Pharmacology, California Institute for Quantitative Biomedical Research and Howard Hughes Medical Institute, San Francisco, CA 94158, USA

<sup>5</sup>Stanford University Chemistry, Engineering, and Medicine for Human Health (ChEM-H), Stanford, CA 94305, USA

<sup>6</sup>Stanford University School of Medicine, Division of Gastroenterology and Hepatology, Stanford, CA 94305, USA

<sup>7</sup>Department of Chemical Engineering, Stanford University, Stanford, CA 94305, USA

<sup>8</sup>Department of Biochemistry (by courtesy), Stanford University, Stanford, CA 94305, USA

\*Correspondence to: [bassik@stanford.edu](mailto:bassik@stanford.edu), [khosla@stanford.edu](mailto:khosla@stanford.edu)

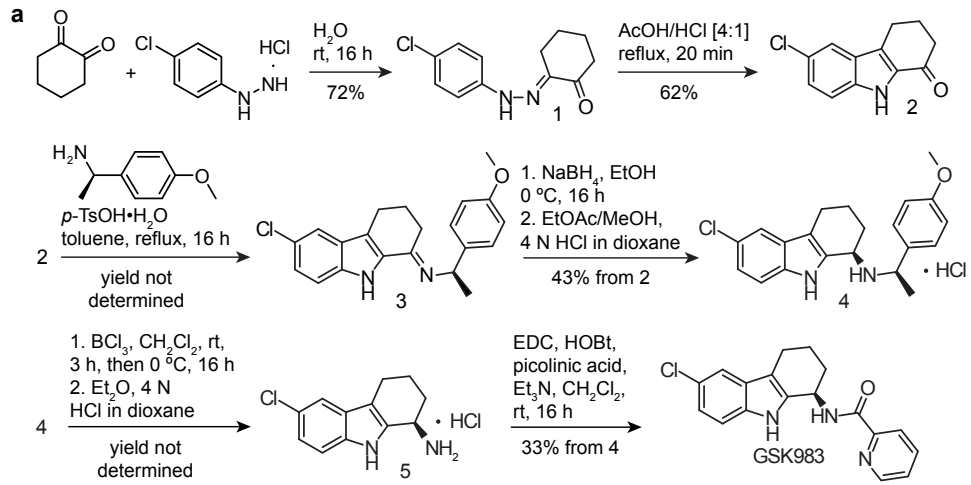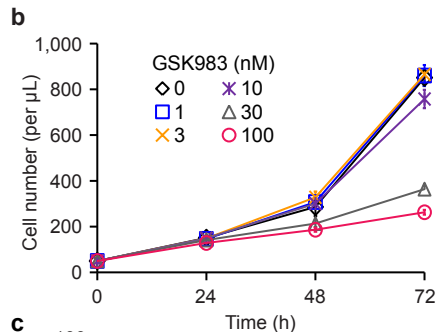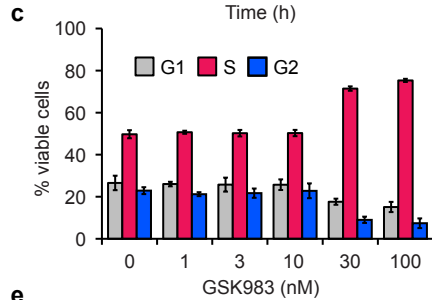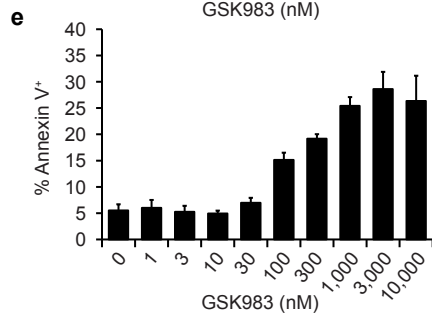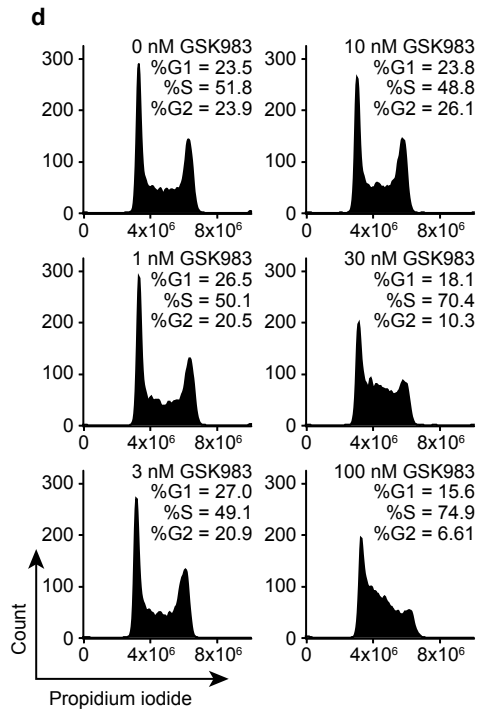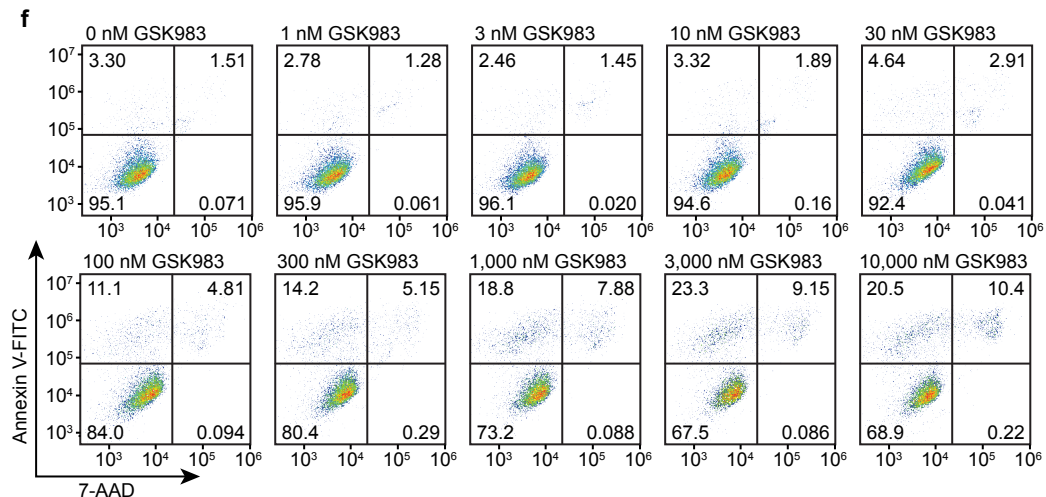

**Supplementary Figure 1.** (a) Synthesis of GSK983. (b) Time-dependence of GSK983-induced growth inhibition in K562 cells. Viable cells were counted by flow cytometry (FSC/SSC) at the indicated time points following treatment with 0–100 nM GSK983. Error bars represent  $\pm$  standard deviation of 4 biological replicates. (c) GSK983-induced S phase cell cycle arrest in K562 cells. Cells were treated with the indicated concentration of GSK983 for 24 h, fixed in 70% EtOH, stained with propidium iodide, and analyzed by flow cytometry. (d) Cell cycle analysis of GSK983-treated K562 cells. Flow cytometry plots depict one of three biological replicates from data summarized in Supplementary Fig. 1c. (e) GSK983-induced apoptosis in K562 cells. Cells were treated with the indicated concentration of GSK983 for 72, fixed in 70% EtOH, stained with annexin V-FITC and 7-AAD, and analyzed by flow cytometry. Error bars represent  $\pm$  standard deviation of 4 biological replicates. (f) GSK983-induced apoptosis in K562 cells. Flow cytometry plots depict one of four biological replicates from data summarized in Supplementary Fig. 1e.

Supplementary Figure 2

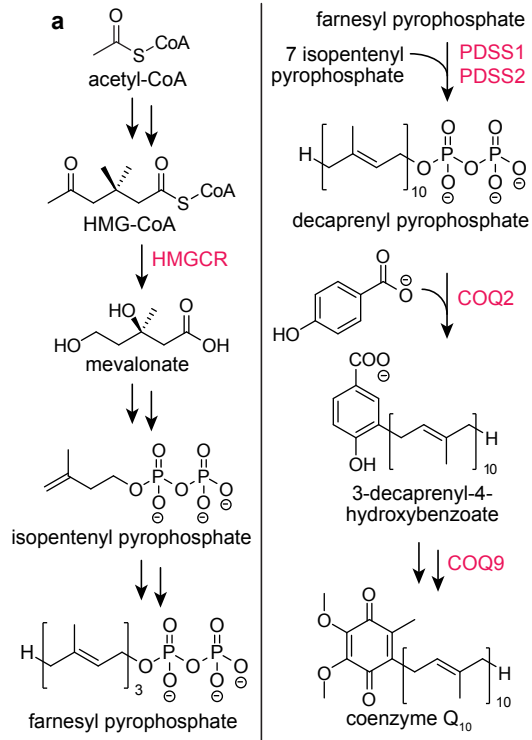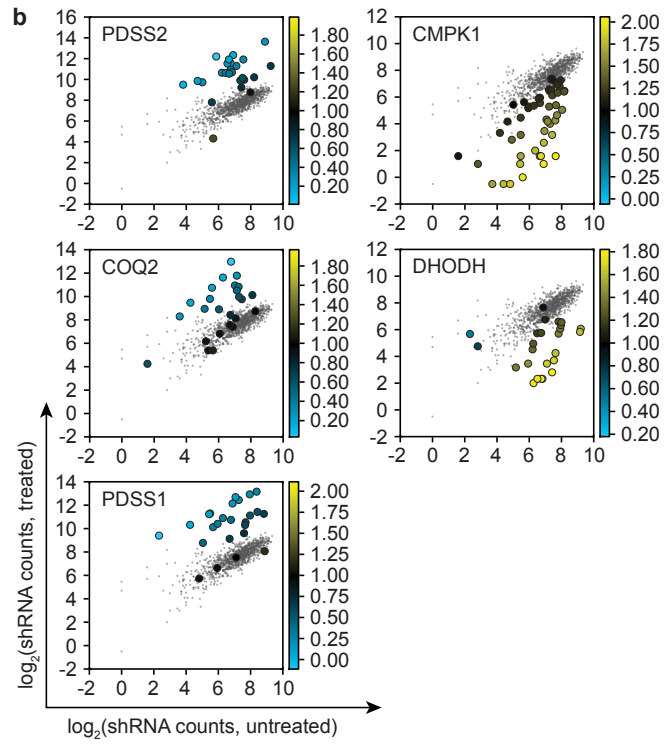

**Supplementary Figure 2.** (a) Mammalian coenzyme Q<sub>10</sub> (CoQ<sub>10</sub>) biosynthesis. Genes shown in bold appeared among the top ten hits in the shRNA screen (PDSS2, COQ2, PDSS1) and/or CRISPR-Cas9 screen (PDSS2, COQ9, HMGCR, PDSS1). (b) Comparison of counts of shRNA-encoding constructs in genomic DNA isolated from untreated and GSK983-treated cells following our genome-wide shRNA screen. For each plot, the enlarged, colored circles represent shRNAs targeting the indicated gene. The grey cloud represents the set of negative control shRNAs.

Supplementary Figure 3

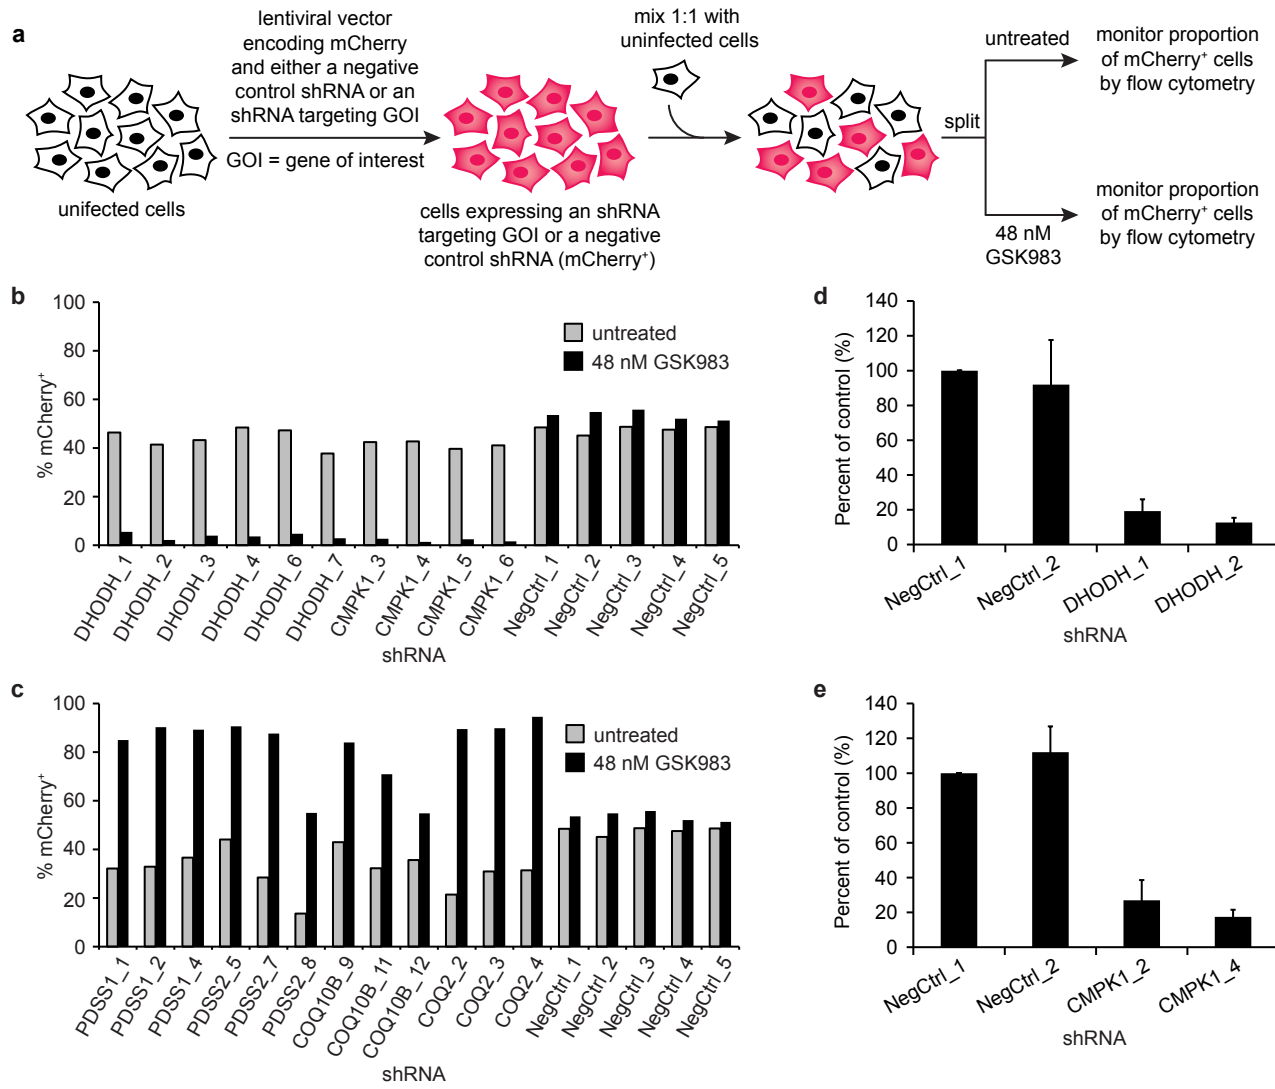

**Supplementary Figure 3.** (a) Schematic representation of competitive growth assays used to retest individual shRNAs. (b) shRNA-mediated knockdown of DHODH or CMPK1 sensitized K562 cells to GSK983 in competitive growth assays. Six shRNAs targeting DHODH, four shRNAs targeting CMPK1, and five negative control shRNAs were retested. Bars represent the average of two biological replicates. (c) shRNA-mediated knockdown of PDSS1, PDSS2, COQ10B, and COQ2 protected K562 cells against GSK983 in competitive growth assays. Three shRNAs targeting each gene and five negative control shRNAs were retested. Bars represent the average of two biological replicates. qPCR to confirm the efficacy of selected shRNAs targeting DHODH (d), and CMPK1 (e). Measurements are the average of 3 replicates, error bars represent  $\pm$  standard deviation of 3 biological replicates. All values are normalized to the first of two negative control shRNAs.

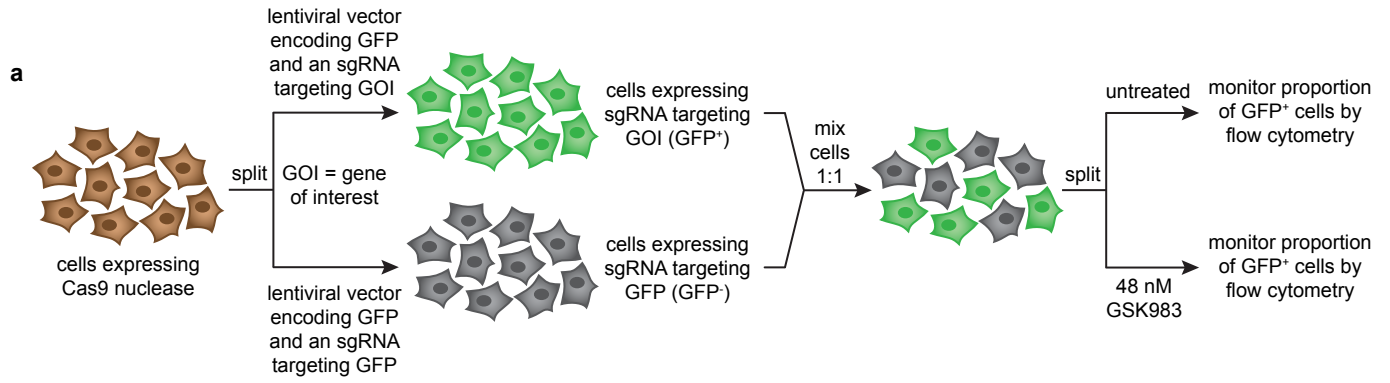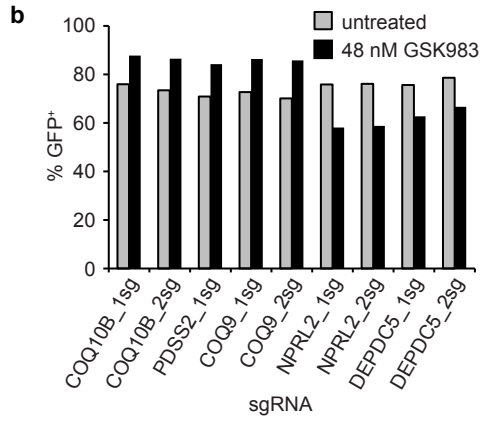



**Supplementary Figure 4.** (a) Schematic representation of competitive growth assays used to validate sgRNAs targeting top hit genes from the CRISPR-Cas9 screen. (b) Retesting in HeLa cells of selected sgRNAs targeting top hit genes from the CRISPR-Cas9 screen. Bars represent the average of two biological replicates.

Supplementary Figure 5

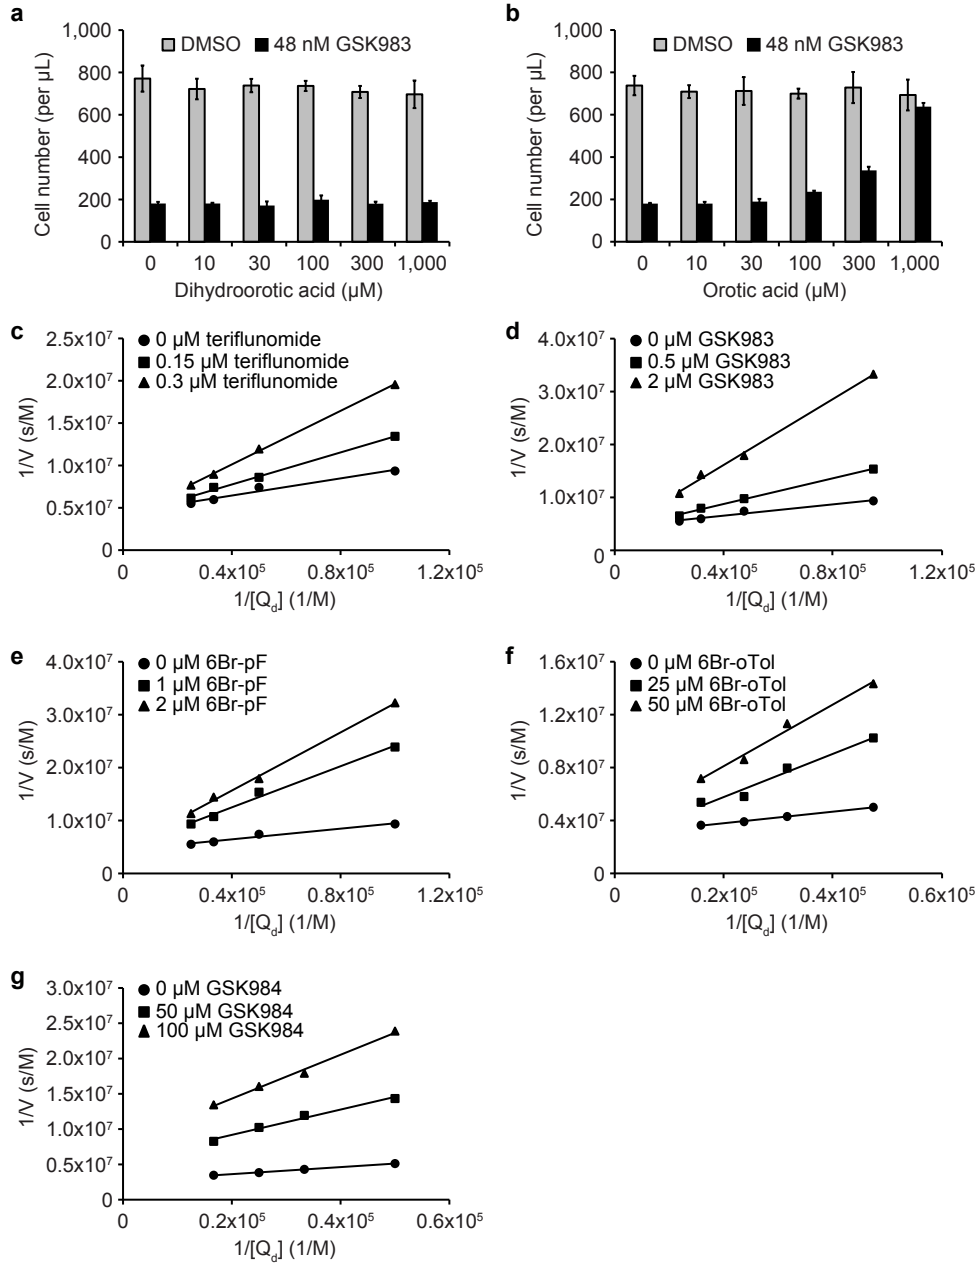

**Supplementary Figure 5.** (a) Dihydroorotic acid had no effect on GSK983-induced growth inhibition in HeLa cells. (b) Orotic acid reversed GSK983-induced growth inhibition in HeLa cells. For (a) and (b), viable cells were counted by flow cytometry (FSC/SSC) following 72 h treatment with 48 nM GSK983 or vehicle and the indicated concentration of (dihydro)orotic acid. Error bars represent  $\pm$  standard deviation of 4 biological replicates. Effect of (c) teriflunomide, (d) GSK983, (e) 6Br-pF, (f) 6Br-oTol, and (g) GSK984 on the activity of recombinant human DHODH *in vitro*. For each inhibitor, the  $K_i$  was determined with respect to the concentration of decylubiquinone ( $Q_d$ ) at two different inhibitor concentrations.

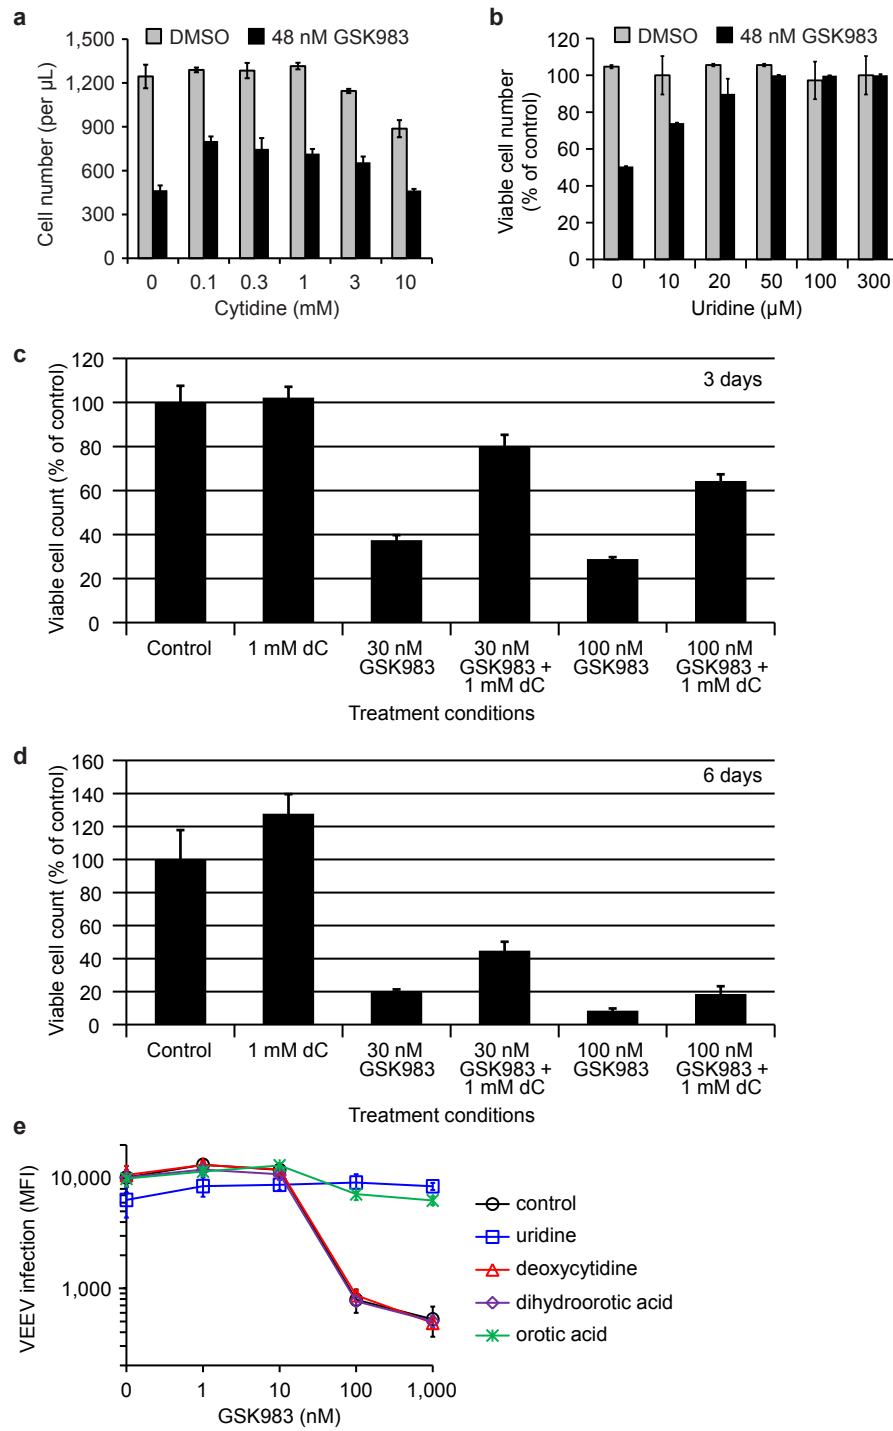

**Supplementary Figure 6.** (a) Cytidine partially reversed GSK983-induced growth inhibition in K562 cells. Viable cells were counted by flow cytometry (FSC/SSC) following 72 h treatment with 48 nM GSK983 or vehicle and the indicated concentration of cytidine. Error bars represent  $\pm$  standard deviation of 4 biological replicates. (b) Low concentrations of exogenous uridine ( $\leq 20 \mu\text{M}$ ) are unable to completely reverse the anti-proliferative effect of GSK983 in K562 cells. Viable cells were counted by flow cytometry (FSC/SSC) following 72 h treatment with 48 nM GSK983 or vehicle and the indicated concentration of uridine. Error bars represent  $\pm$  standard deviation of 4 biological replicates. 1 mM exogenous deoxycytidine largely reversed the anti-proliferative effect of 30 nM GSK983 in K562 cells after 3 days (c), but this effect was less pronounced after 6 days (d). Viable cells were counted by flow cytometry (FSC/SSC) following 3 day (c) or 6 day (d) treatment with the indicated concentration of GSK983 and deoxycytidine. Error bars represent  $\pm$  standard deviation of 4 biological replicates. (e) Effect of GSK983 on VEEV-GFP replication in A549 cells in the absence of exogenous pyrimidines (control, black circles), or in the presence of 1 mM uridine (blue squares), 1 mM deoxycytidine (red triangles), 1 mM dihydroorotic acid (purple diamonds), or 1 mM orotic acid (green stars). A549 cells were incubated with the indicated combination of GSK983 and pyrimidine metabolite for 24 h prior to VEEV infection. Cells were then incubated with VEEV (MOI = 20 plaque-forming units/cell) for an additional 16 h. Viral replication was measured by GFP fluorescence using flow cytometry. Error bars represent  $\pm$  standard deviation of 3 biological replicates.

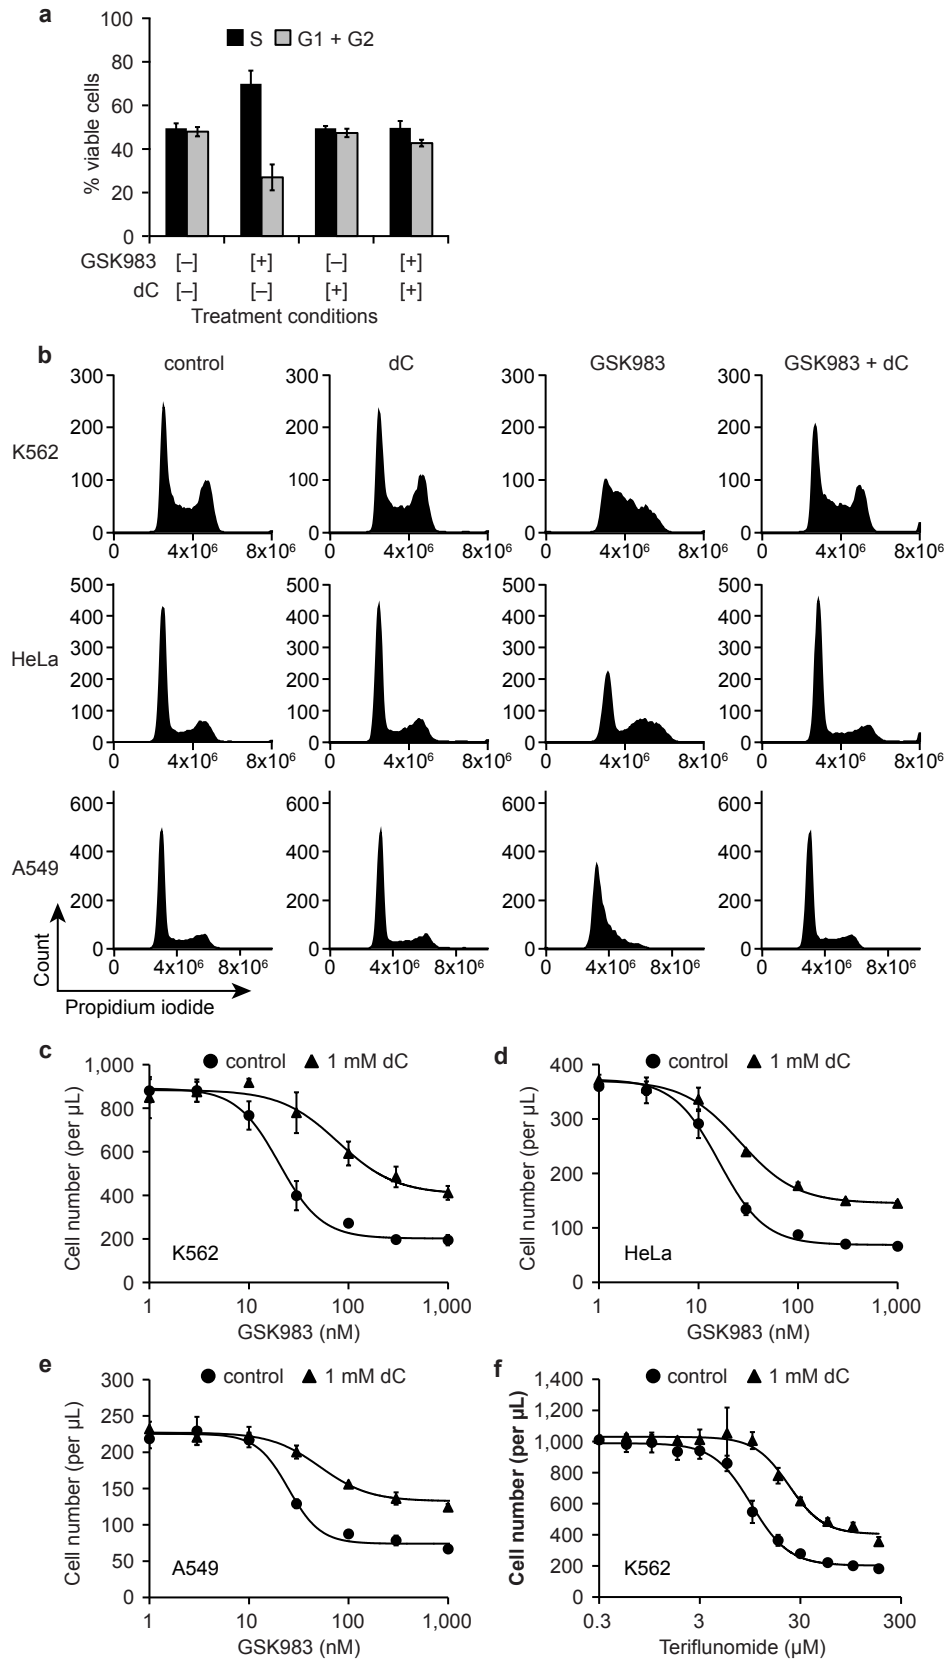

**Supplementary Figure 7.** (a) Summary of results from EdU-based cell cycle analysis shown in Fig. 3g. Error bars represent  $\pm$  standard deviation of 3 biological replicates. (b) Deoxycytidine (dC) reversed GSK983-induced S phase cell cycle arrest in K562, HeLa, and A549 cells. For all three cell lines, cells were treated with 48 nM GSK983 for 24 h, fixed in 70% EtOH, stained with propidium iodide, and analyzed by flow cytometry. For each cell line, flow cytometry plots are representative of three biological replicates. Deoxycytidine reduced GSK983 toxicity in (c) K562 cells, (d) HeLa cells, and (e) A549 cells at all growth-inhibitory doses. For (c), (d), and (e), viable cells were counted by flow cytometry (FSC/SSC) following 72 h treatment with GSK983 at the indicated concentration. Error bars represent  $\pm$  standard deviation of 4 biological replicates. (f) Deoxycytidine alleviated teriflunomide toxicity in K562 cells at all growth-inhibitory doses. Viable cells were counted by flow cytometry (FSC/SSC) following 72 h treatment with teriflunomide at the indicated concentration. Error bars represent  $\pm$  standard deviation of 4 biological replicates.

## Supplementary Results

**Supplementary Dataset 1.** Complete gene rankings from the genome-wide shRNA screen (Microsoft Excel file available online).

**Supplementary Dataset 2.** Complete gene rankings from the genome-wide CRISPR-Cas9 screen (Microsoft Excel file available online).

**Supplementary Table 1.** Results of GO analysis (top 50 hits from the shRNA screen).

| <b>GO Category</b>                                           | <b><i>p</i>-value</b> |
|--------------------------------------------------------------|-----------------------|
| quinone biosynthetic process                                 | 0.000560487           |
| pyrimidine nucleoside monophosphate biosynthetic process     | 0.000560487           |
| ubiquinone biosynthetic process                              | 0.000560487           |
| pyrimidine ribonucleoside monophosphate biosynthetic process | 0.000560487           |
| UMP metabolic process                                        | 0.000560487           |
| ubiquinone metabolic process                                 | 0.000560487           |
| UMP biosynthetic process                                     | 0.000560487           |
| pyrimidine ribonucleoside monophosphate metabolic process    | 0.000560487           |
| pyrimidine nucleoside monophosphate metabolic process        | 0.000603765           |
| isoprenoid biosynthetic process                              | 0.002040748           |
| ketone biosynthetic process                                  | 0.002375797           |
| pyrimidine ribonucleoside biosynthetic process               | 0.002375797           |
| pyrimidine ribonucleotide biosynthetic process               | 0.002431869           |
| quinone metabolic process                                    | 0.002564597           |
| pyrimidine ribonucleotide metabolic process                  | 0.002564597           |
| pyrimidine nucleotide biosynthetic process                   | 0.003433603           |
| pyrimidine nucleoside biosynthetic process                   | 0.003803045           |
| pyrimidine ribonucleoside metabolic process                  | 0.00418987            |
| pyrimidine-containing compound biosynthetic process          | 0.005278701           |
| pyrimidine nucleotide metabolic process                      | 0.007333439           |



**Supplementary Table 2.** Results of GO analysis (top 50 hits from the CRISPR-Cas9 screen).

| <b>GO Category</b>                        | <b><i>p</i>-value</b>      |
|-------------------------------------------|----------------------------|
| ubiquinone metabolic process              | 6.32667 x 10 <sup>-9</sup> |
| ubiquinone biosynthetic process           | 1.51045 x 10 <sup>-7</sup> |
| quinone metabolic process                 | 1.51045 x 10 <sup>-7</sup> |
| cellular ketone metabolic process         | 1.51045 x 10 <sup>-7</sup> |
| quinone biosynthetic process              | 1.88033 x 10 <sup>-7</sup> |
| oxidoreduction coenzyme metabolic process | 1.88033 x 10 <sup>-7</sup> |
| coenzyme biosynthetic process             | 2.31975 x 10 <sup>-6</sup> |
| ketone biosynthetic process               | 2.71449 x 10 <sup>-6</sup> |
| coenzyme metabolic process                | 9.20268 x 10 <sup>-6</sup> |
| cofactor biosynthetic process             | 9.20268 x 10 <sup>-6</sup> |
| cofactor metabolic process                | 5.80963 x 10 <sup>-5</sup> |
| protein tetramerization                   | 0.000510309                |
| isoprenoid biosynthetic process           | 0.003560433                |

**Supplementary Table 3.** shRNA-encoding constructs used in individual retests.

| shRNA   | Gene Targeted | Strand | Sequence                                                             |
|---------|---------------|--------|----------------------------------------------------------------------|
| DHODH_1 | DHODH         | top    | CGCCGTGGACGGACTTTATAAGTAGTGAAGCT<br>TCAGATGTACTTATAAAGTCCGTCCACGGCT  |
|         |               | bottom | AGCCGTGGACGGACTTTATAAGTACATCTGAA<br>GCTTCACTACTTATAAAGTCCGTCCACGGCG  |
| DHODH_2 | DHODH         | top    | CCGGGATTTATCAACTCAAAGTAGTGAAGCT<br>TCAGATGTAGTTTGGAGTTGATAAATCCCGGA  |
|         |               | bottom | TCCGGGATTTATCAACTCAAAGTACATCTGAA<br>GCTTCACTAGTTTGGAGTTGATAAATCCCGGG |
| DHODH_3 | DHODH         | top    | ATCTTGCAAGGACATTGAATATTAGTGAAGCT<br>TCAGATGTAATATTCAATGTCCTTGCAAGAC  |
|         |               | bottom | GTCTTGCAAGGACATTGAATATTACATCTGAA<br>GCTTCACTAATATTCAATGTCCTTGCAAGAT  |
| DHODH_4 | DHODH         | top    | AAAGTGTGACTCCAAAACCTCATAGTGAAGCT<br>TCAGATGTATGAGGTTTTGGAGTCACACTTC  |
|         |               | bottom | GAAGTGTGACTCCAAAACCTCATACATCTGAA<br>GCTTCACTATGAGGTTTTGGAGTCACACTTT  |
| DHODH_6 | DHODH         | top    | AGAAGAACAAGACCTCAGTGGATAGTGAAGCT<br>TCAGATGTATCCACTGAGGTCTTGTTCTTCC  |
|         |               | bottom | GGAAGAACAAGACCTCAGTGGATACATCTGAA<br>GCTTCACTATCCACTGAGGTCTTGTTCTTCT  |
| DHODH_7 | DHODH         | top    | CTGCAAGGACATTGAATATTAGTAGTGAAGCT<br>TCAGATGTACTAATATTCAATGTCCTTGCAA  |
|         |               | bottom | TTGCAAGGACATTGAATATTAGTACATCTGAA<br>GCTTCACTACTAATATTCAATGTCCTTGCGAG |
| CMPK1_3 | CMPK1         | top    | AAGAGGGGAAAGAGTAGTGGTATAGTGAAGCT<br>TCAGATGTATAACCACTACTCTTTCCCTCTC  |
|         |               | bottom | GAGAGGGGAAAGAGTAGTGGTATACATCTGAA<br>GCTTCACTATAACCACTACTCTTTCCCTCTT  |
| CMPK1_4 | CMPK1         | top    | AGCTGCCAATGCTCAGAAGAATTAGTGAAGCT<br>TCAGATGTAATTCTTCTGAGCATTGGCAGCC  |
|         |               | bottom | GGCTGCCAATGCTCAGAAGAATTACATCTGAA<br>GCTTCACTAATTCTTCTGAGCATTGGCAGCT  |
| CMPK1_5 | CMPK1         | top    | ATTGCACAATGTGTTTGGTAAATAGTGAAGCT<br>TCAGATGTATTTACCAAACACATTGTGCAAG  |
|         |               | bottom | CTTGCACAATGTGTTTGGTAAATACATCTGAA<br>GCTTCACTATTTACCAAACACATTGTGCAAT  |
| CMPK1_6 | CMPK1         | top    | CCGCGTATATATCCCTCTAGTATAGTGAAGCT<br>TCAGATGTATACTAGAGGGATATATACGCGT  |
|         |               | bottom | ACGCGTATATATCCCTCTAGTATACATCTGAA<br>GCTTCACTATACTAGAGGGATATATACGCGG  |

| shRNA     | Gene Targeted | Strand | Sequence                                                            |
|-----------|---------------|--------|---------------------------------------------------------------------|
| PDSS1_1   | PDSS1         | top    | ATCTCAGATACCCTATATTAATTAGTGAAGCT<br>TCAGATGTAATTAATATAGGGTATCTGAGAC |
|           |               | bottom | GTCTCAGATACCCTATATTAATTACATCTGAA<br>GCTTCACTAATTAATATAGGGTATCTGAGAT |
| PDSS1_2   | PDSS1         | top    | AAAGAGGAAAACACACAGTTAATAGTGAAGCT<br>TCAGATGTATTAAGTGTGTGTTTTCTCTTC  |
|           |               | bottom | GAAGAGGAAAACACACAGTTAATACATCTGAA<br>GCTTCACTATTAAGTGTGTGTTTTCTCTTT  |
| PDSS1_4   | PDSS1         | top    | AAATAGCTTTTCAGCTAATAGATAGTGAAGCT<br>TCAGATGTATCTATTAGCTGAAAAGCTATTC |
|           |               | bottom | GAATAGCTTTTCAGCTAATAGATACATCTGAA<br>GCTTCACTATCTATTAGCTGAAAAGCTATTT |
| PDSS2_5   | PDSS2         | top    | ATCACTGAAATTGGCTTAATTATAGTGAAGCT<br>TCAGATGTATAATTAAGCCAATTCAGTGAC  |
|           |               | bottom | GTCACCTGAAATTGGCTTAATTATACATCTGAA<br>GCTTCACTATAATTAAGCCAATTCAGTGAT |
| PDSS2_7   | PDSS2         | top    | AAGAGATCACGGAGCTAATTCATAGTGAAGCT<br>TCAGATGTATGAATTAGCTCCGTGATCTCTG |
|           |               | bottom | CAGAGATCACGGAGCTAATTCATACATCTGAA<br>GCTTCACTATGAATTAGCTCCGTGATCTCTT |
| PDSS2_8   | PDSS2         | top    | CGGAGACTTTCTTCTAGCAAATTAGTGAAGCT<br>TCAGATGTAATTTGCTAGAAGAAAGTCTCCA |
|           |               | bottom | TGGAGACTTTCTTCTAGCAAATTACATCTGAA<br>GCTTCACTAATTTGCTAGAAGAAAGTCTCCG |
| COQ10B_9  | COQ10B        | top    | CTCAGACTATTTGTAAGTTATTTAGTGAAGCT<br>TCAGATGTAATAAGTTACAAATAGTCTGAA  |
|           |               | bottom | TTCAGACTATTTGTAAGTTATTTACATCTGAA<br>GCTTCACTAATAAGTTACAAATAGTCTGAG  |
| COQ10B_11 | COQ10B        | top    | ACACGAACTTTCTTCAAATCATAGTGAAGCT<br>TCAGATGTATGATTTTGAAGAAAGTTTCGTGC |
|           |               | bottom | GCACGAACTTTCTTCAAATCATACATCTGAA<br>GCTTCACTATGATTTTGAAGAAAGTTTCGTGT |
| COQ10B_12 | COQ10B        | top    | CGAGCAGAACTCTTCCACTACATAGTGAAGCT<br>TCAGATGTATGTAGTGAAGAGTTCTGCTCA  |
|           |               | bottom | TGAGCAGAACTCTTCCACTACATACATCTGAA<br>GCTTCACTATGTAGTGAAGAGTTCTGCTCG  |
| COQ2_2    | COQ2          | top    | CAGCCTTGGGCTTGACATTTAATAGTGAAGCT<br>TCAGATGTATTAATGTCAAGCCCAAGGCTA  |
|           |               | bottom | TAGCCTTGGGCTTGACATTTAATACATCTGAA<br>GCTTCACTATTAATGTCAAGCCCAAGGCTG  |

| shRNA     | Gene Targeted | Strand | Sequence                                                             |
|-----------|---------------|--------|----------------------------------------------------------------------|
| COQ2_3    | COQ2          | top    | CCCTGAGGATTGTTGGAATAAATAGTGAAGCT<br>TCAGATGTATTTATTCCAACAATCCTCAGGT  |
|           |               | bottom | ACCTGAGGATTGTTGGAATAAATACATCTGAA<br>GCTTCACTATTTATTCCAACAATCCTCAGGG  |
| COQ2_4    | COQ2          | top    | ATGGGACCAGGACTATGATAAATAGTGAAGCT<br>TCAGATGTATTTATCATAGTCCTGGTCCCAC  |
|           |               | bottom | GTGGGACCAGGACTATGATAAATACATCTGAA<br>GCTTCACTATTTATCATAGTCCTGGTCCCAT  |
| NegCtrl_1 | none          | top    | AACCGGCTACTAGGTGATTAAGTAGTGAAGCT<br>TCAGATGTACTTAATCACCTAGTAGCCGGTC  |
|           |               | bottom | GACCGGCTACTAGGTGATTAAGTACATCTGAA<br>GCTTCACTACTTAATCACCTAGTAGCCGGTT  |
| NegCtrl_2 | none          | top    | AACTTACTAACTTCGACATCATTAGTGAAGCT<br>TCAGATGTAATGATGTCTGAAGTTAGTAAGTG |
|           |               | bottom | CACTTACTAACTTCGACATCATTACATCTGAA<br>GCTTCACTAATGATGTCTGAAGTTAGTAAGTT |
| NegCtrl_3 | none          | top    | AGCACTCGCATTTCGGAGTCAACTAGTGAAGCT<br>TCAGATGTAGTTGACTCCGAATGCGAGTGCG |
|           |               | bottom | CGCACTCGCATTTCGGAGTCAACTACATCTGAA<br>GCTTCACTAGTTGACTCCGAATGCGAGTGCT |
| NegCtrl_4 | none          | top    | ACGAAATTAGTTCCTGGTCAATTAGTGAAGCT<br>TCAGATGTAATTGACCAGGAACTAATTTTCGC |
|           |               | bottom | GCGAAATTAGTTCCTGGTCAATTACATCTGAA<br>GCTTCACTAATTGACCAGGAACTAATTTTCGT |
| NegCtrl_5 | none          | top    | CTCTCCACGACTGATATGGTAATAGTGAAGCT<br>TCAGATGTATTACCATATCAGTCGTGGAGAA  |
|           |               | bottom | TTCTCCACGACTGATATGGTAATACATCTGAA<br>GCTTCACTATTACCATATCAGTCGTGGAGAG  |

**Supplementary Table 4.** sgRNA-encoding constructs used in individual retests.

| sgRNA      | Gene Targeted | Strand | Sequence                  |
|------------|---------------|--------|---------------------------|
| NPRL2_1sg  | NPRL2         | top    | GATAGGTGATCTTGGGTCCCAGCGT |
|            |               | bottom | ACGCTGGGACCCAAGATCACCTATC |
| NPRL2_2sg  | NPRL2         | top    | GCTGAAGAATATGCATTCGATG    |
|            |               | bottom | CATCGAATGCATATTCTTCAGC    |
| DEPDC5_1sg | DEPDC5        | top    | GTCATCCACAAGAAGGGCTTTG    |
|            |               | bottom | CAAAGCCCTTCTTGTGGATGAC    |
| DEPDC5_2sg | DEPDC5        | top    | GTCATCCACAAGAAGGGCTT      |
|            |               | bottom | AAGCCCTTCTTGTGGATGAC      |
| COQ9_1sg   | COQ9          | top    | GGCGGCGGTATCTGGTGCGCT     |
|            |               | bottom | AGCGCACCAGATACCGCCGCC     |
| COQ9_2sg   | COQ9          | top    | GCGGTATCTGGTGCGCTTGGCC    |
|            |               | bottom | GGCCAAGCGCACCAGATACCGC    |
| COQ10B_1sg | COQ10B        | top    | GACTGGTCATACGGCCTTGAGA    |
|            |               | bottom | TCTCAAGGCCGTATGACCAGTC    |
| COQ10B_2sg | COQ10B        | top    | GGCCTTGAGAAGGGTAGTCTC     |
|            |               | bottom | GAGACTACCCTTCTCAAGGCC     |
| GFP_1sg    | GFP           | top    | GACCAGGATGGGCACCACCC      |
|            |               | bottom | GGGTGGTGCCCATCCTGGTC      |

**Supplementary Dataset 1.** Complete gene rankings from the genome-wide shRNA screen (Microsoft Excel file available online).

**Supplementary Dataset 2.** Complete gene rankings from the genome-wide CRISPR-Cas9 screen (Microsoft Excel file available online).
